# Supplementary material for: Piezo1-mediated mechano-energetics regulate CAR T cell function
Source: Research Square preprint supplement (doi:10.21203/rs.3.rs-7776704/v1), 2025-10-23
Supplement: Supplementary file 1 [file bf0d1c48a9de1970db4c46af.pdf]

## **Supplementary Information for**

# **Piezo1-mediated mechano-energetics regulate CAR T cell function**

### **This Supplementary Information file includes:**

Supplementary Methods

Supplementary Figures 1-7

Supplementary Table 1-3

### **I. Supplementary Methods.**

#### **Piezo1 modulation by plasmid transfection and lentivirus transduction**

Piezo1 loss-of-function (Piezo1 LOF) and gain-of-function (Piezo1 GOF) studies were achieved via Piezo1 knockout by plasmid transfection and Piezo1 activation by lentiviral transduction. T cells were seeded at a density of  $0.5 \times 10^6$  cells per well in 24-well plates and subjected to either Piezo1 knockout by PIEZO1 CRISPR/Cas9 KO Plasmid or Piezo1 activation by lentiviral transduction with PIEZO1 Lentiviral Activation Particles. For knockout, cells were transfected with 3  $\mu\text{g}$  of Piezo1 CRISPR/Cas9 plasmid (CAT# sc-410555, Santa Cruz Biotechnology) using UltraCruz® transfection reagent (CAT# sc-395739, Santa Cruz Biotechnology) and Plasmid Transfection Medium (CAT# sc-108062, Santa Cruz Biotechnology). For activation, T cells were transduced with Piezo1 lentiviral particles in the presence of Polybrene (5  $\mu\text{g}/\text{mL}$ , CAT# sc-134220, Santa Cruz Biotechnology). To image live-Piezo1, CAR T cells were seeded at a density of  $0.5 \times 10^6$  cells per well in 24-well plates and transfected with a custom plasmid using Viafect Transfection reagent (CAT#E4981, Promega). The plasmid contains human PIEZO1 coding sequence, split into N- and C-terminal fragments with an EGFP reporter fused internally (VectorID: VB221213-1527ewt, VectorBuilder). In all cases, cultures were refreshed at 48 h with ImmunoCult-XF T Cell Expansion Medium (CAT# 10981, StemCell Technologies) supplemented with recombinant human IL-2 (200 IU/mL, CAT# 200-02, Peprotech) and maintained at 37 °C with 5% CO<sub>2</sub>. Successful transfection and transduction were confirmed by immunostaining of Piezo1 or percentage of GFP-expressing cells.

## II. Supplementary Figures

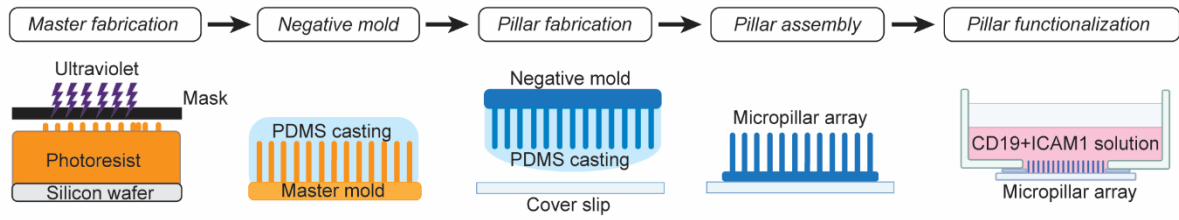

**Supplementary Figure 1. Micropillar array fabrication and functionalization.** Schematic illustration of procedures for PDMS micropillar array fabrication and functionalization. The PDMS micropillar array was fabricated from a double-molding soft lithography process: silicon master mold manufactured using photolithography, PDMS casting of master mold to produce negative mold, and replicating PDMS micropillar array on a glass coverslip from the negative mold. The fabricated micropillar array on glass coverslip was assembled to the bottom of a 35 mm confocal dish, then was functionalized via immersion in a protein solution comprising ICAM-1 and FTIC-conjugated CD19.

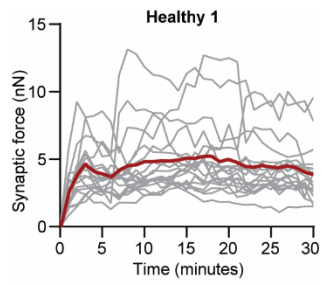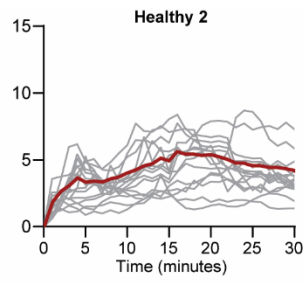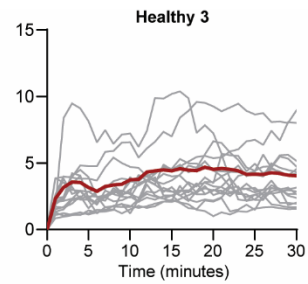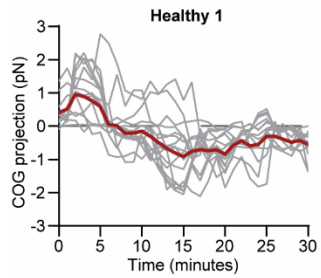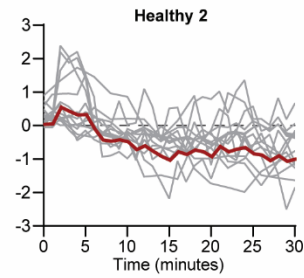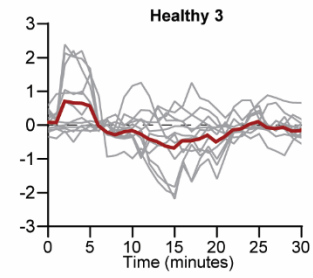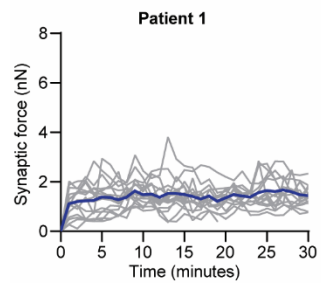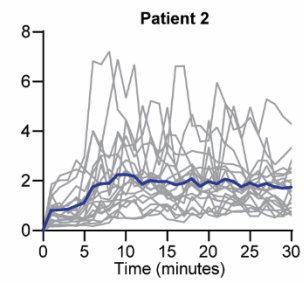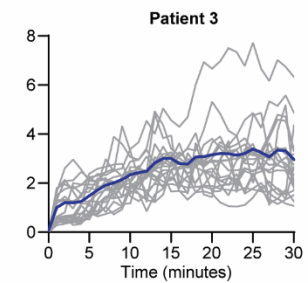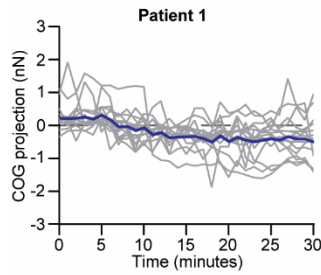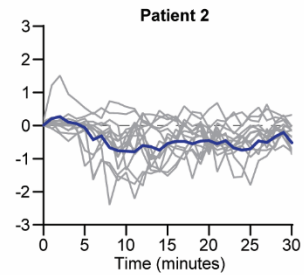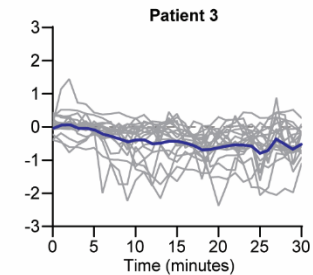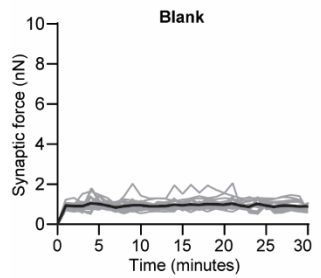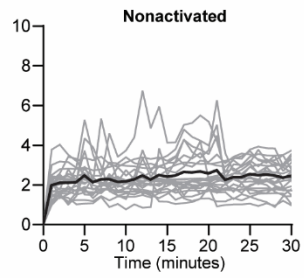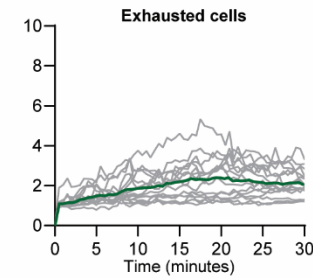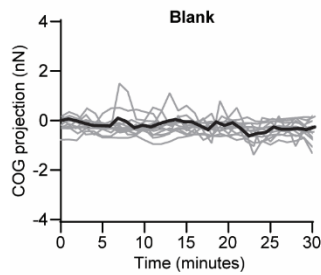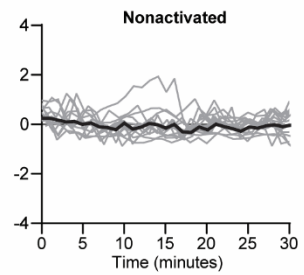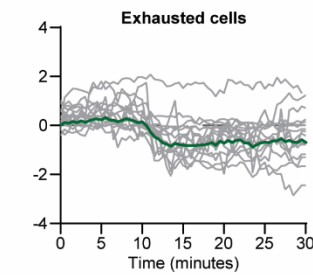

**Supplementary Figure 2. Mapping the synaptic force dynamics of CAR T cells derived from individual healthy donors, patients, induced exhaustion, and nonactivated cells.** Activated CAR T cells derived from healthy donors, patients, and the induced exhaustion group were seeded onto micropillar substrates functionalized with CD19 and ICAM-1. Nonactivated CAR T cells were seeded onto substrates coated with ICAM-1 only, and the blank group was seeded on Poly-L-lysine-coated substrates to assess nonspecific attachment. Grey lines represent force measurements from individual cells; thick colored lines indicate group averages (n = 20 cells per group). All data were obtained from three independent experiments.

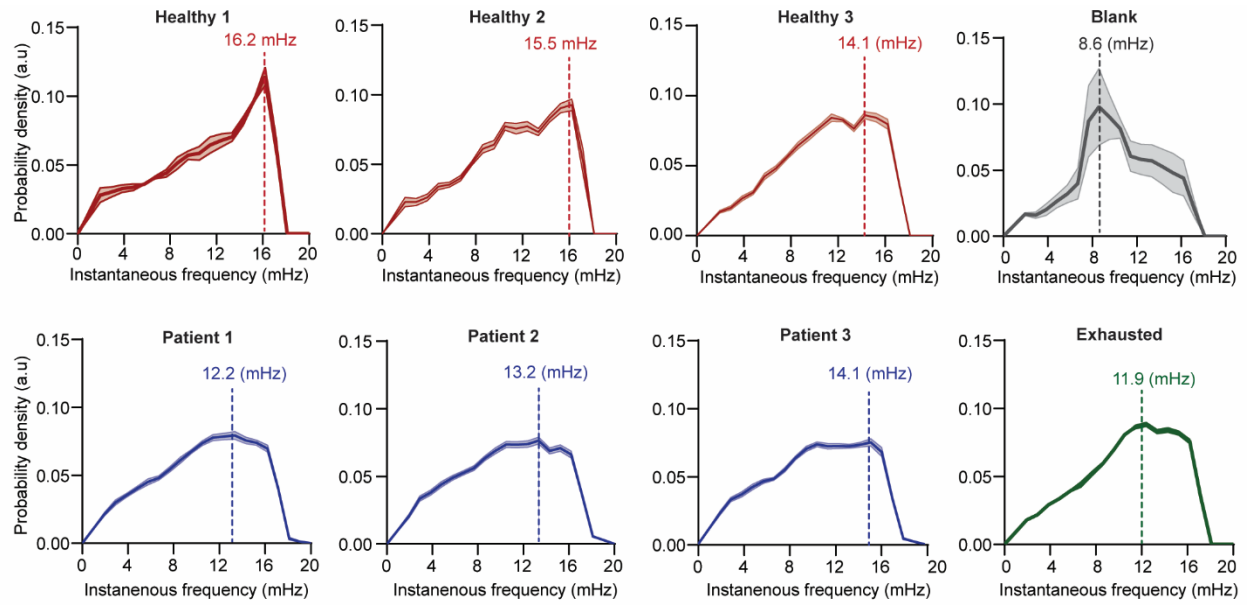

**Supplementary Figure 3. Instantaneous frequency spectrum analysis of CAR T cell synaptic force dynamics.** The frequency spectrum ( $n = 20$  cells) was calculated from the synaptic force dynamics profiles in Supplementary Figure 2, including CAR T cells derived from individual healthy donors and patients, and exhausted CAR T cells activated on CD19/ICAM-1-functioned PDMS micropillar array, as well as control group of CAR T cells seeded on Poly-L-lysine-coated micropillar array substrates (blank). Thick lines denote mean, shaded areas denote s.e.m. All data was collected from three independent experiments.

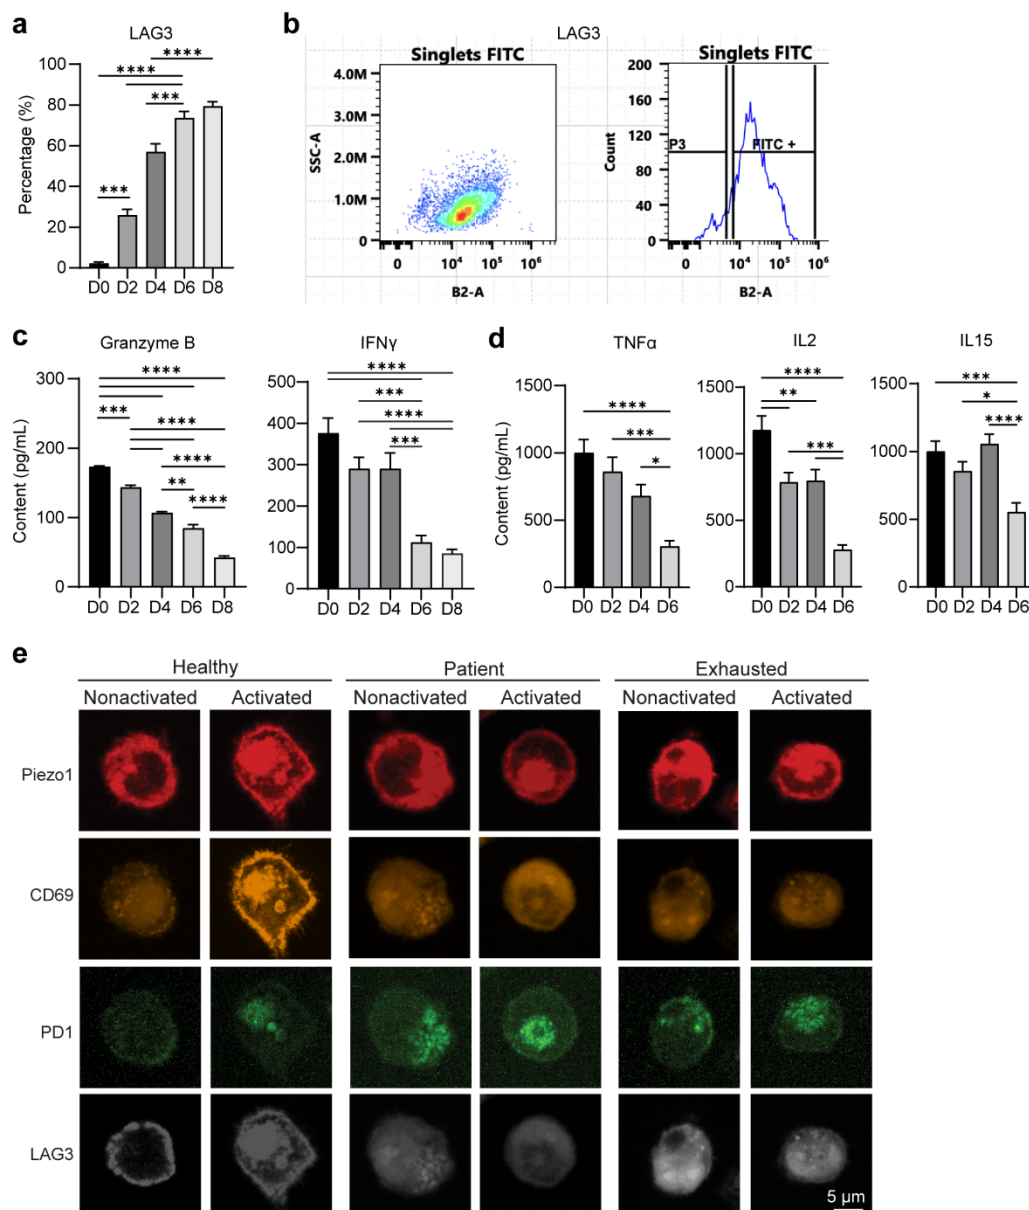

**Supplementary Figure 4. Validation of CAR T cell exhaustion phenotypes during serial re-stimulation.** (a) Flow cytometry results showing percentage of CAR T cells expressing exhaustion marker LAG-3 during an 8 day-period of induced exhaustion in vitro ( $n = 10$ ). CAR T cells were activated with CD19-coated beads on D0 and re-stimulated by CD19-coated beads every two days. (b) Representative images showing gating strategy for flow cytometry analysis for identifying negative and positive cell percentage in healthy CAR T cells stained with LAG-3. All events were first gated on singles by plotting SSC-A against the fluorescence parameter to exclude doublets and aggregates. Within the singlet population, marker-specific gates were then applied. Alexa Fluor 488-tagged LAG-3 positive cells as those falling outside of gate P3 on the B2-A histogram. Positive selection thresholds were established relative to unstained controls to ensure accurate discrimination between positive and negative populations. (c) ELISA measured Granzyme B ( $n=3$  technical replicates) and IFN $\gamma$  ( $n = 10$  technical replicates) secretion from CAR T cells over time during induced exhaustion. (d) ELISA measured secretion of TNF $\alpha$ , IL2 and IL15 over time during

induced exhaustion (n=10 technical replicates). Data are presented as mean  $\pm$  s.e.m. Statistical comparisons were performed using one-way ANOVA with Tukey's post hoc test. (e) Representative immunostaining images of Piezo1, activation marker CD69, and exhausted markers PD1 and LAG3 in healthy donor-derived, patient-derived and exhausted CAR T cells.

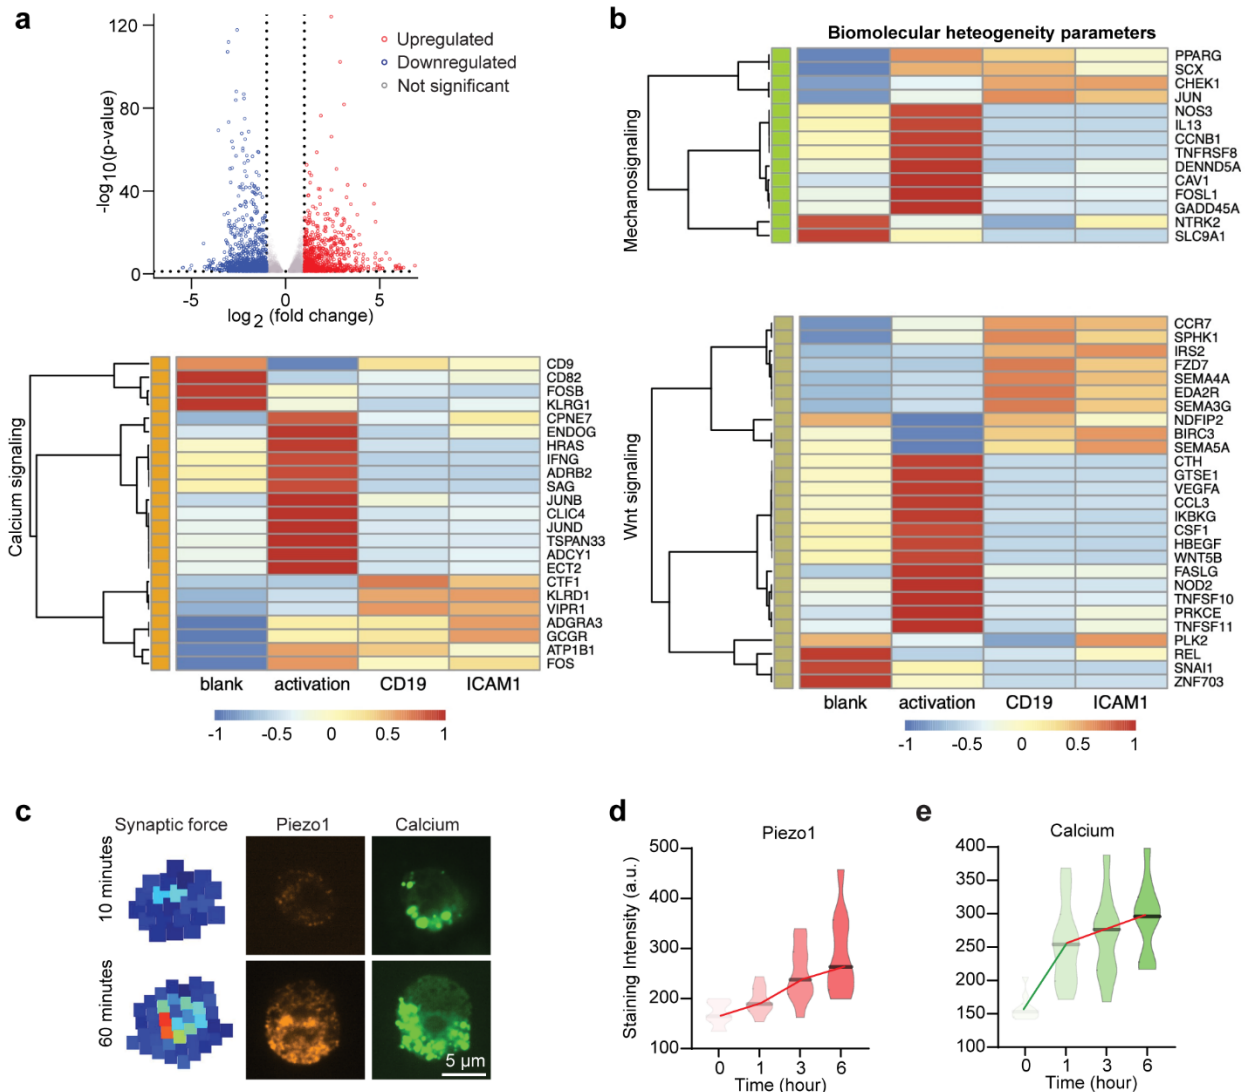

**Supplementary Figure 5. Whole-transcriptome analysis with total RNA sequencing of mechanosensitive signaling involved in CAR T cell activation.** (a) Volcano plot showing differentially expressed genes (DEGs) determined by bulk RNA sequencing using DESeq2 analysis (adjusted  $p < 0.05$ ). (b) Heatmaps of normalized expression for genes in mechanosignaling, calcium, and Wnt pathways in CAR T cells across four substrates conditions: blank, CD19/ICAM-1 (activation), CD19-only, and ICAM-1-only. Expression values are normalized and genes are hierarchically clustered to highlight co-expression modules. Data was collected from 2 technical replicates per condition. (c) Representative synaptic force heatmap, and live imaging of Piezo1 and  $\text{Ca}^{2+}$  activities measured by Fluo4-AM in CAR T cells 10 and 60 minutes after seeding on CD19/ICAM-1 functionalized micropillar array substrates, showing increase in Piezo1-mediated  $\text{Ca}^{2+}$  signaling and synaptic force upon activation. (d) Quantification of Piezo1 expression and (e) intracellular  $\text{Ca}^{2+}$  activities in CAR T cell upon activation ( $n = 10$  cells). The thick line represents the mean over time and the filled area represents the error bar presented as s.e.m.

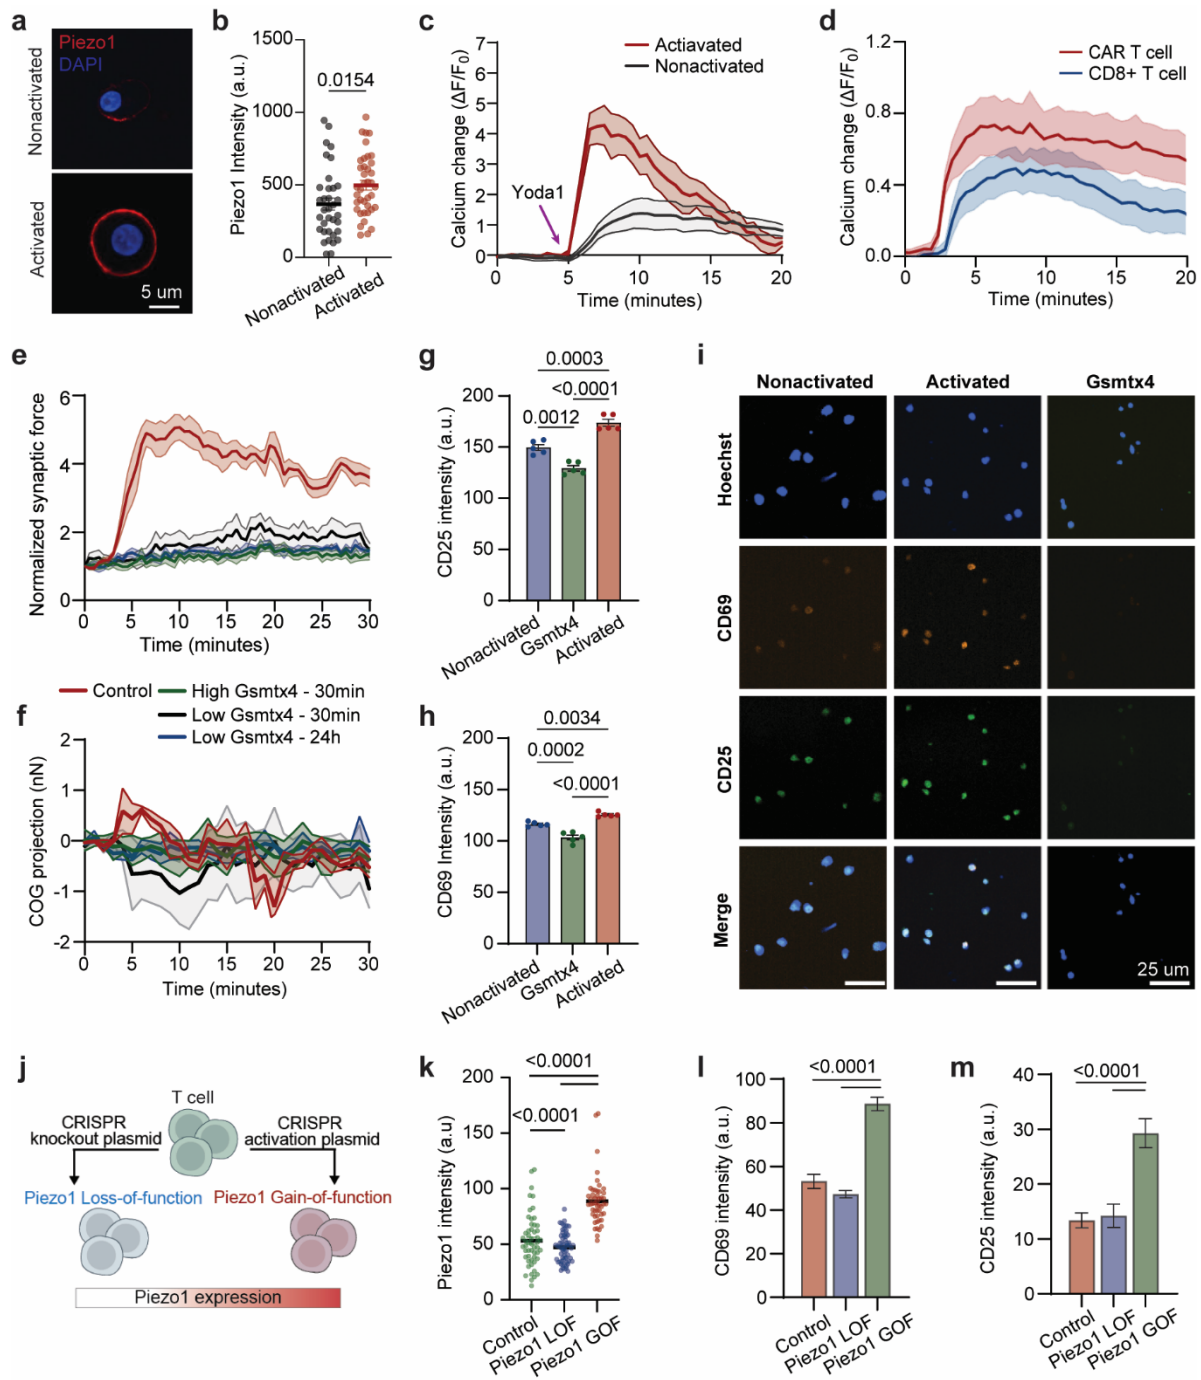

**Supplementary Figure 6. Piezo1 regulates force generation and activation of CD8<sup>+</sup> cytotoxic T cells.** (a) Representative immunofluorescent images and (b) quantification of Piezo1 expression intensity in nonactivated (n = 35 cells) and activated (n = 39 cells) CD8<sup>+</sup> T cells. Activated T cells were seeded on micropillars functionalized with ICAM-1 (20  $\mu$ g/mL) and anti-CD3 $\epsilon$ /CD28 antibodies (30  $\mu$ g/mL), while nonactivated controls were seeded on ICAM-1 only. Statistical comparison by two-tailed unpaired Student's t-test. (c) Time-course of calcium influx in nonactivated and activated T cells measured using Fluo-4AM (n = 20 cells, 3 independent experiments). Activated T cell group was seeded on glass substrate functionalized with ICAM-1 and anti-CD3 $\epsilon$ /CD28 antibodies, while nonactivated group was seeded on glass substrate with

ICAM-1 only. **(d)** Time-course of calcium influx in CD19-activated CAR T cells vs CD3 $\epsilon$ /CD28-activated CD8<sup>+</sup> T cells measured using Fluo-4AM (n = 20 cells, 2 independent experiments). In c–d, calcium intensity ( $\Delta F/F_0$ ) was normalized to baseline (T = 0 min). **(e)** Normalized synaptic force dynamics and **(f)** force directionality of CD8<sup>+</sup> cytotoxic T cells interacting with ICAM-1/anti-CD3 $\epsilon$ /CD28-coated micropillars (activated group) or ICAM-1-coated micropillars (nonactivated control group). T cells were pretreated with high-dose (2.5  $\mu$ M, 30 minutes) or low-dose (1  $\mu$ M, 30 minutes or 24 hours) GsMTx4, or left untreated (n = 10 cells each group, 2 independent experiments). Data in e, f were normalized to their respective initial values at T = 0 min. **(g–h)** Quantification and **(i)** representative immunofluorescent images of T cell activation markers CD69 and CD25 expression in CD8<sup>+</sup> T cells exposed to ICAM-1/anti-CD3 $\epsilon$ /CD28-coated substrates (activated) or ICAM-1-only substrates (nonactivated) after 24 hours (n = 5 technical replicates). T cells in GsMTx4 group were pretreated with 2.5  $\mu$ M GsMTx4 for 30 minutes and exposed to ICAM-1/anti-CD3 $\epsilon$ /CD28-coated substrates after 24 hours (n = 5 technical replicates). **(j)** Schematic of Piezo1 modulation via PIEZO1 CRISPR/Cas9 KO Plasmid loss-of-function (Piezo1 LOF) and PIEZO1 lentiviral-based gain-of-function (Piezo1 GOF) constructs. Schematic was created in BioRender. Details see Supplementary Methods. **(k)** Immunofluorescent quantification of Piezo1 expression in control, Piezo1 LOF, and Piezo1 GOF T cells (n = 35 cells). **(l, m)** Expression of CD69 **(l)** and CD25 **(m)** across control (n = 64 cells), Piezo1 LOF (n = 53 cells for CD69, 48 for CD25), and Piezo1 GOF (n = 50 cells for both) groups. In c–f, thick lines denote group means and shaded regions indicate  $\pm$  s.e.m. In g, h, k–m, data are presented as mean  $\pm$  s.e.m. and p-values were calculated using one-way ANOVA with Tukey's post hoc test.

### III. Supplementary Tables

**Supplementary Table 1. Summary data for correlation matrix in Figure 1K.**

|              | <b>E<sub>fe</sub></b> | <b>CD69</b> | <b>CD25</b> | <b>IFN<math>\gamma</math></b> | <b>TNF<math>\alpha</math></b> | <b>ATP</b> |
|--------------|-----------------------|-------------|-------------|-------------------------------|-------------------------------|------------|
| Activated    | 7.7684908             | 254.93325   | 200.23075   | 35.99103758                   | 25.58019231                   | 1          |
| Nonactivated | 2.2279598             | 136.61995   | 134.6762    | 1.14591623                    | 1.14591623                    | 0.5392367  |
| Patient      | 4.4988748             | 168.360687  | 128.150687  | 1.009515548                   | 1.429180892                   | 0.3176778  |

**Supplementary Table 2. List of antibodies used in immunofluorescent (IF) and Flow cytometry (Flow) analyses.**

| <b>Antibody</b>                               | <b>Vendor and Catalog number</b>         | <b>Assay</b>  | <b>Dilution</b> |
|-----------------------------------------------|------------------------------------------|---------------|-----------------|
| Biotinylated monoclonal anti-FMC63 scFv (CAR) | CAT#FM3-BY54, ACRO Biosystems            | IF            | 1:50            |
| Alexa Fluor 532 anti-CD25                     | CAT#310916, Thermo Fisher Scientific     | IF            | 1:50            |
| Alexa Fluor 488 anti-CD69                     | CAT#58-0251-82, Thermo Fisher Scientific | IF            | 1:50            |
| PE-conjugated anti-CD69                       | CAT#310906, clone BL-CD6, BioLegend      | Flow          | 1:30            |
| PE-conjugated anti-CD25                       | CAT#302606, clone BC96, BioLegend        | Flow          | 1:30            |
| PE anti-human CD279 (PD-1)                    | CAT#329906, BioLegend                    | IF            | 1:30            |
| FITC anti-human CD223 (LAG-3)                 | CAT#369308, BioLegend                    | IF, Flow      | 1:50            |
| FITC anti-human CD54                          | CAT#322720, BioLegend                    | IF            | 1:50            |
| Alexa Fluor 555 Phalloidin                    | CAT#A34055, Thermo Fisher Scientific     | IF            | 1:300           |
| Piezol1 monoclonal antibody                   | CAT#MA5-32876, Thermo Fisher Scientific  | IF            | 1:200           |
| Alexa Fluor 488 Piezol1 Antibody              | CAT#NBP1-78446AF488, Novus Biologicals   | Digital ELISA | 1:100           |
| Pacific Blue <sup>TM</sup> anti-human CD69    | CAT#310919, Biolegend                    | Digital ELISA | 1:100           |
| FITC anti-human CD31                          | CAT#303104, BioLegend                    | IF            | 1:50            |
| APC anti-human CD90                           | CAT#328113, BioLegend                    | IF            | 1:50            |
| Alexa Fluor 488 anti-Ki-67                    | CAT#151204, BioLegend                    | IF            | 1:50            |
| LIVE/DEAD fixable aqua dead cell stain Kit    | CAT#L34965, Thermo Fisher Scientific     | Flow          | 1:200           |
| APC-goat anti-mouse secondary antibody        | CAT#A-865, Invitrogen                    | IF            | 1:400           |
| DAPI                                          | CAT#D3571, Invitrogen                    | IF            | 1:1000          |
| Hoechst 33342                                 | CAT# H3570, Invitrogen                   | IF            | 1:1000          |

**Supplementary Table 3. The primer sequences used qRT-PCR analysis.**

| Gene   | Forward sequence        | Reverse sequence        |
|--------|-------------------------|-------------------------|
| PIEZO1 | CCTGGAGAAGACTGACGGCTAC  | ATGCTCCTTGGATGGTGAGTCC  |
| PIEZO2 | GACGGACACAACCTTTGAGCCTG | CTGGCTTTGTTGGGCACTCATTG |
| TRPV4  | TCACTCTCACCGCCTACTACCA  | CCCAGTGAAGAGCGTAATGACC  |
| ORAI1  | AGGTGATGAGCCTCAACGAGCA  | AGTCGTGGTCAGCGTCCAGCT   |
| STIM1  | CACTCTTTGGCACCTTCCACGT  | CTGTCACCTCGCTCAGTGCTTG  |
| AKT1   | TGGACTACCTGCACTCGGAGAA  | GTGCCGCAAAGGTCTTCATGG   |
| mTOR   | AGCATCGGATGCTTAGGAGTGG  | CAGCCAGTCATCTTTGGAGACC  |
| YAP    | TGTCCCAGATGAACGTCACAGC  | TGGTGGCTGTTTCACTGGAGCA  |
| ITPR3  | GCAACCACATCTGGACGCTCTT  | AGAAGGCGTTGATGGTGTCCAG  |
| NFAT1  | GATAGTGGGCAACACCAAAGTCC | TCTCGCCTTTCCGCAGCTCAAT  |
| WASF1  | CCCTACCTGTAATCAGTGATGCC | GCTTCCTGTTACGCTGCTCTT   |
| CAMK2A | GAGCCATTCTCACACGATGCT   | TGGTGTGGTGCTCTCTGAGGA   |
| MST1   | CCACATCAGCACCGATTTACGC  | CGTCGAGGTTCCAGCAGAAGTT  |
| MST2   | GGCAGATTTTGGAGTGGCTGGT  | AATGCCAAGGGACCAGATGTCG  |
| TRPC1  | CCAAACTGCTGGTGGCAATGCT  | GGAATGATGTTGAAAGGTGGAGG |
| TRPM7  | GAAGCACCATCTTGGACTCTTGC | GGACCACAGATTTGAGGGATAAC |
